# Supplementary material for: Nucleotide composition affects codon usage toward the 3'-end
Source: PubMed Central journal article supplement (PMC6892556; doi:10.1371/journal.pone.0225633), 2019-12-04
Supplement: pone.0225633.s002.pdf [file pone.0225633.s002.pdf]

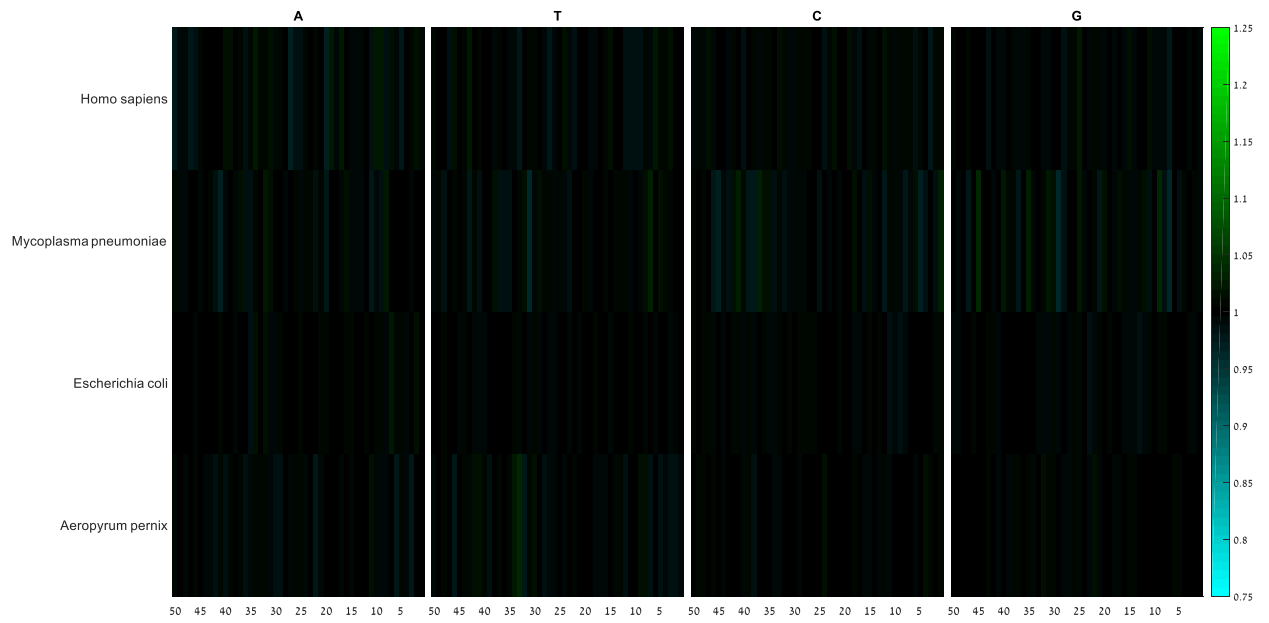

**Figure S2. Group RSCA scores ( $R_{\alpha}^S$ ) of A-ending, T-ending, C-ending, and G-ending codons along the last 50 codons of the gene for random codon permutation. Rows denote species, columns denote positions.**
