# Supplementary material for: Nucleotide composition affects codon usage toward the 3'-end
Source: PubMed Central journal article supplement (PMC6892556; doi:10.1371/journal.pone.0225633), 2019-12-04
Supplement: pone.0225633.s005.pdf [file pone.0225633.s005.pdf]

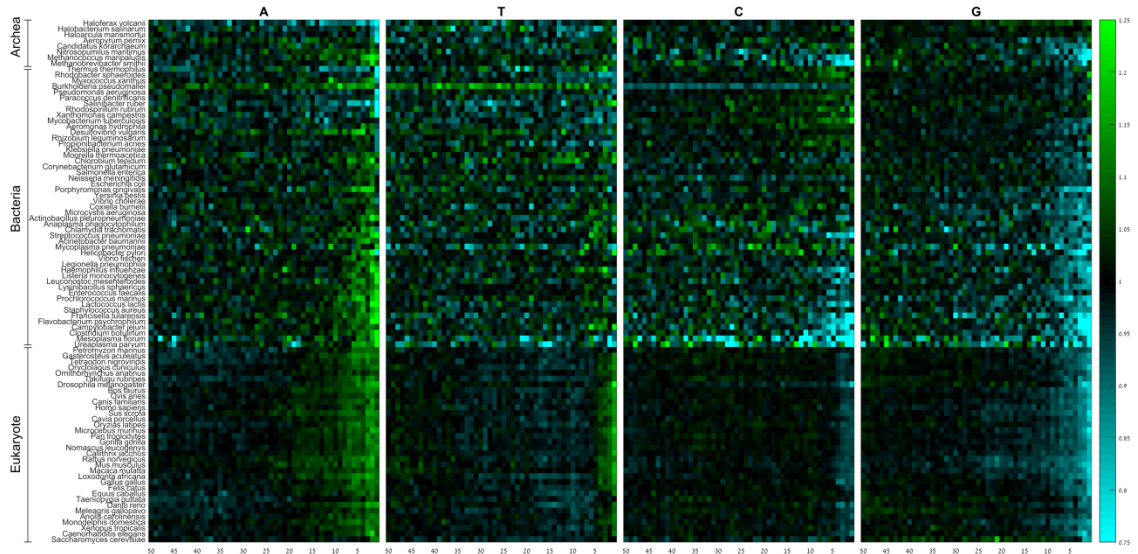

**Figure S5. Group RSCA scores ( $R_{\alpha}^S$ ) of A-ending, T-ending, C-ending, and G-ending triplets after introducing +1nt frameshift to the coding region (i.e., examining the first codon position in the original coding sequence) along the last 50 codons of the gene. Rows denote species, columns denote positions. Species within domains are sorted from high (top) to low (bottom) GC-content.**
