# Supplementary material for: Nucleotide composition affects codon usage toward the 3'-end
Source: PubMed Central journal article supplement (PMC6892556; doi:10.1371/journal.pone.0225633), 2019-12-04
Supplement: pone.0225633.s011.pdf [file pone.0225633.s011.pdf]

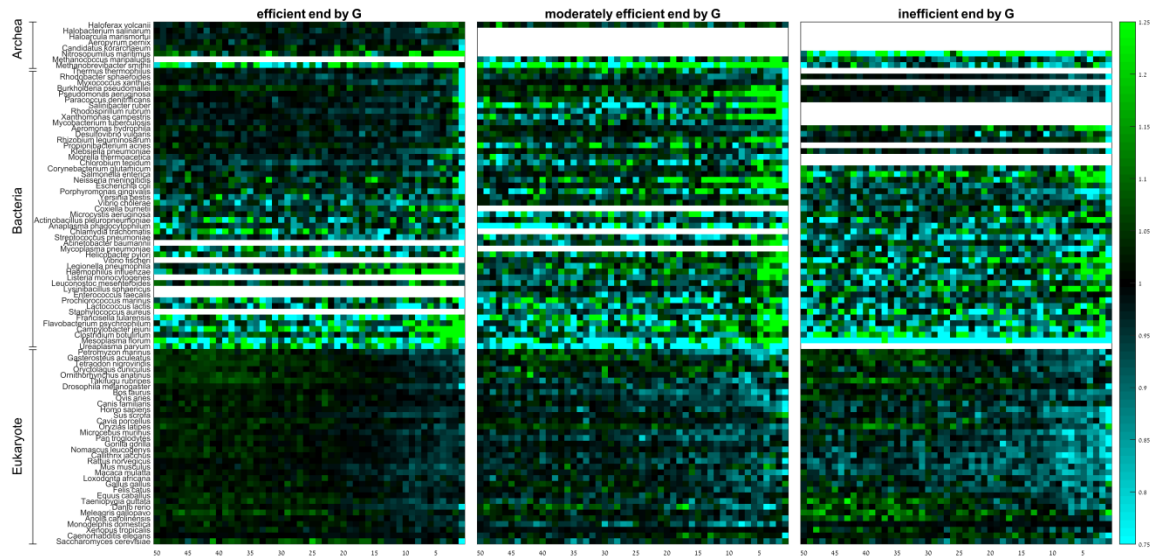

**Figure S11. Group RSCA scores ( $R_{\alpha}^S$ ) of efficient, moderately efficient, and inefficient codons ending by G along the last 50 codons of the gene.** Rows denote species, columns denote positions. Species where none of the codons in a particular efficiency group end by G (missing data) are shown as white stripes. Species within domains are sorted as in Figure S9.
