# Supplementary material for: Nucleotide composition affects codon usage toward the 3'-end
Source: PubMed Central journal article supplement (PMC6892556; doi:10.1371/journal.pone.0225633), 2019-12-04
Supplement: pone.0225633.s013.pdf [file pone.0225633.s013.pdf]

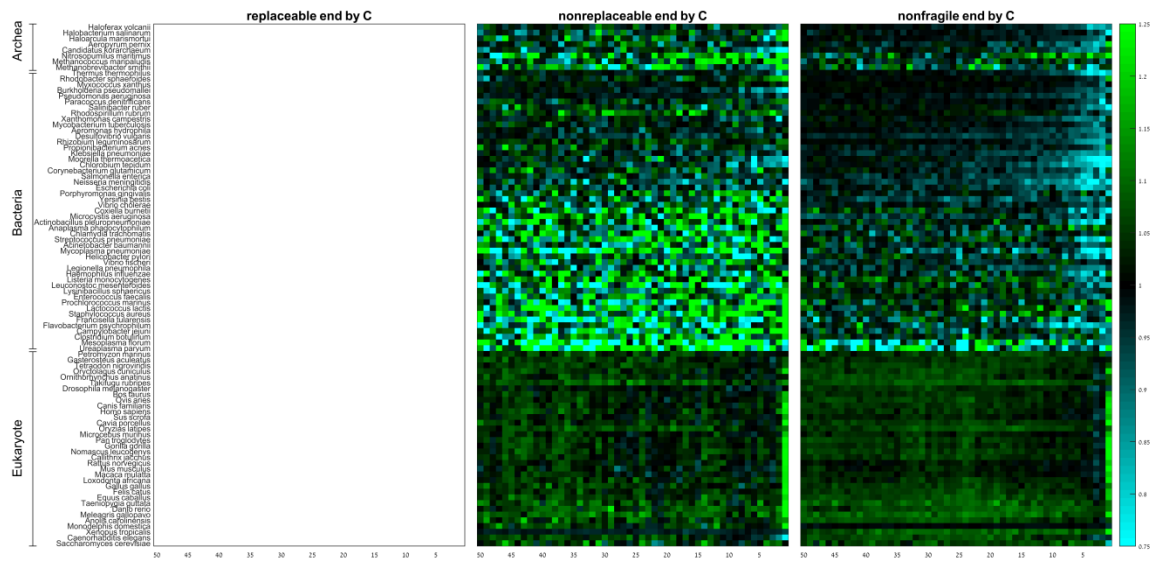

**Figure S13. Group RSCA scores ( $R_{\alpha}^S$ ) of replaceable, non-replaceable, and non-fragile codons ending by C along the last 50 codons of the gene. Rows denote species, columns denote positions. As there are no replaceable codons that end by C, all species are depicted by white stripes (missing data). Species within domains are sorted as in Figure S12.**
