# Supplementary material for: Nucleotide composition affects codon usage toward the 3'-end
Source: PubMed Central journal article supplement (PMC6892556; doi:10.1371/journal.pone.0225633), 2019-12-04
Supplement: pone.0225633.s014.pdf [file pone.0225633.s014.pdf]

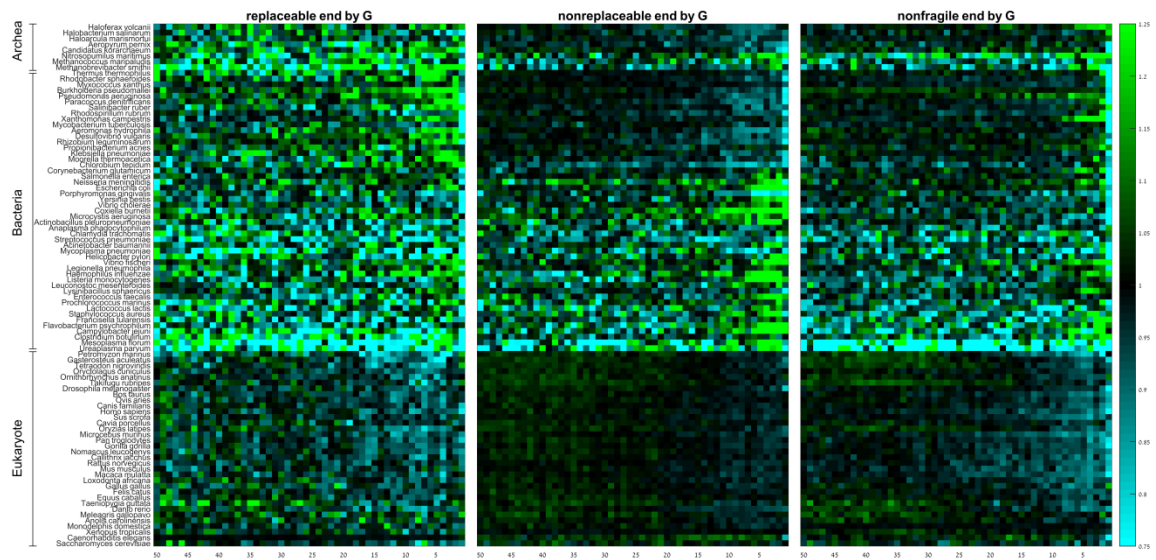

**Figure S14. Group RSCA scores ( $R_{\alpha}^S$ ) of replaceable, non-replaceable, and non-fragile codons ending by G along the last 50 codons of the gene. Rows denote species, columns denote positions. Species within domains are sorted as in Figure S12.**
