# Supplementary material for: Nucleotide composition affects codon usage toward the 3'-end
Source: PubMed Central journal article supplement (PMC6892556; doi:10.1371/journal.pone.0225633), 2019-12-04
Supplement: pone.0225633.s015.pdf [file pone.0225633.s015.pdf]

| <b>Species</b>                  | <b>Number of genes</b> | <b>Median gene length</b> | <b>A content</b> | <b>C content</b> | <b>G content</b> | <b>T content</b> |
|---------------------------------|------------------------|---------------------------|------------------|------------------|------------------|------------------|
| <i>Anolis carolinensis</i>      | 18553                  | 1200                      | 0.28             | 0.23             | 0.25             | 0.23             |
| <i>Bos taurus</i>               | 19978                  | 1167                      | 0.24             | 0.27             | 0.27             | 0.21             |
| <i>Caenorhabditis elegans</i>   | 20320                  | 993                       | 0.30             | 0.21             | 0.22             | 0.27             |
| <i>Callithrix jacchus</i>       | 20933                  | 1134                      | 0.26             | 0.26             | 0.26             | 0.22             |
| <i>Canis familiaris</i>         | 19847                  | 1206                      | 0.25             | 0.26             | 0.27             | 0.21             |
| <i>Cavia porcellus</i>          | 18640                  | 1173                      | 0.25             | 0.26             | 0.27             | 0.22             |
| <i>Danio rerio</i>              | 25659                  | 1206                      | 0.27             | 0.24             | 0.25             | 0.23             |
| <i>Drosophila melanogaster</i>  | 13893                  | 1182                      | 0.25             | 0.27             | 0.27             | 0.21             |
| <i>Equus caballus</i>           | 20427                  | 1092                      | 0.26             | 0.26             | 0.26             | 0.22             |
| <i>Felis catus</i>              | 20427                  | 1092                      | 0.26             | 0.26             | 0.26             | 0.22             |
| <i>Gallus gallus</i>            | 20427                  | 1092                      | 0.26             | 0.26             | 0.26             | 0.22             |
| <i>Gasterosteus aculeatus</i>   | 20784                  | 1149                      | 0.24             | 0.28             | 0.28             | 0.20             |
| <i>Gorilla gorilla</i>          | 20699                  | 1131                      | 0.25             | 0.26             | 0.26             | 0.22             |
| <i>Homo sapiens</i>             | 22680                  | 1233                      | 0.25             | 0.27             | 0.27             | 0.22             |
| <i>Loxodonta africana</i>       | 20023                  | 1107                      | 0.25             | 0.26             | 0.26             | 0.22             |
| <i>Macaca mulatta</i>           | 21037                  | 1122                      | 0.26             | 0.25             | 0.26             | 0.22             |
| <i>Meleagris gallopavo</i>      | 14104                  | 1188                      | 0.28             | 0.23             | 0.25             | 0.23             |
| <i>Microcebus murinus</i>       | 18071                  | 1224                      | 0.25             | 0.26             | 0.27             | 0.22             |
| <i>Monodelphis domestica</i>    | 21307                  | 1167                      | 0.27             | 0.24             | 0.24             | 0.24             |
| <i>Mus musculus</i>             | 22606                  | 1137                      | 0.25             | 0.26             | 0.26             | 0.22             |
| <i>Nomascus leucogenys</i>      | 18569                  | 1221                      | 0.25             | 0.26             | 0.26             | 0.22             |
| <i>Ornithorhynchus anatinus</i> | 21674                  | 825                       | 0.24             | 0.27             | 0.27             | 0.21             |
| <i>Oryctolagus cuniculus</i>    | 19284                  | 1161                      | 0.24             | 0.27             | 0.27             | 0.21             |
| <i>Oryzias latipes</i>          | 19662                  | 1125                      | 0.25             | 0.26             | 0.27             | 0.22             |
| <i>Ovis aries</i>               | 20882                  | 1128                      | 0.25             | 0.26             | 0.27             | 0.21             |

|                                        |       |      |      |      |      |      |
|----------------------------------------|-------|------|------|------|------|------|
| <i>Pan troglodytes</i>                 | 18688 | 1212 | 0.25 | 0.26 | 0.26 | 0.22 |
| <i>Petromyzon marinus</i>              | 10280 | 894  | 0.21 | 0.30 | 0.30 | 0.18 |
| <i>Rattus norvegicus</i>               | 22255 | 1107 | 0.25 | 0.26 | 0.26 | 0.22 |
| <i>Saccharomyces cerevisiae</i>        | 6650  | 1079 | 0.32 | 0.19 | 0.21 | 0.28 |
| <i>Sus scrofa</i>                      | 21600 | 1014 | 0.25 | 0.26 | 0.27 | 0.22 |
| <i>Taeniopygia guttata</i>             | 17454 | 948  | 0.26 | 0.25 | 0.26 | 0.22 |
| <i>Takifugu rubripes</i>               | 18514 | 1287 | 0.25 | 0.27 | 0.27 | 0.21 |
| <i>Tetraodon nigroviridis</i>          | 19593 | 1145 | 0.24 | 0.28 | 0.28 | 0.20 |
| <i>Xenopus tropicalis</i>              | 18442 | 1227 | 0.29 | 0.22 | 0.24 | 0.25 |
| <i>Acinetobacter baumannii</i>         | 7420  | 813  | 0.30 | 0.19 | 0.21 | 0.29 |
| <i>Actinobacillus pleuropneumoniae</i> | 2012  | 819  | 0.30 | 0.19 | 0.23 | 0.27 |
| <i>Aeromonas hydrophila</i>            | 4106  | 870  | 0.19 | 0.32 | 0.31 | 0.18 |
| <i>Anaplasma phagocytophilum</i>       | 1303  | 593  | 0.28 | 0.17 | 0.26 | 0.29 |
| <i>Burkholderia pseudomallei</i>       | 6320  | 981  | 0.16 | 0.34 | 0.35 | 0.15 |
| <i>Campylobacter jejuni</i>            | 1619  | 813  | 0.37 | 0.13 | 0.18 | 0.32 |
| <i>Chlamydia trachomatis</i>           | 894   | 870  | 0.28 | 0.19 | 0.22 | 0.30 |
| <i>Chlorobium tepidum</i>              | 2216  | 720  | 0.22 | 0.28 | 0.28 | 0.20 |
| <i>Clostridium botulinum</i>           | 3401  | 780  | 0.41 | 0.11 | 0.18 | 0.30 |
| <i>Corynebacterium glutamicum</i>      | 3052  | 810  | 0.23 | 0.27 | 0.27 | 0.23 |
| <i>Coxiella burnetii</i>               | 1823  | 738  | 0.29 | 0.20 | 0.23 | 0.28 |
| <i>Desulfovibrio vulgaris</i>          | 3496  | 777  | 0.19 | 0.32 | 0.30 | 0.18 |
| <i>Enterococcus faecalis</i>           | 3241  | 750  | 0.34 | 0.17 | 0.21 | 0.28 |
| <i>Escherichia coli</i>                | 4099  | 849  | 0.24 | 0.24 | 0.27 | 0.24 |

|                                     |      |     |      |      |      |      |
|-------------------------------------|------|-----|------|------|------|------|
| <i>Flavobacterium psychrophilum</i> | 2443 | 846 | 0.38 | 0.15 | 0.17 | 0.29 |
| <i>Francisella tularensis</i>       | 1604 | 786 | 0.36 | 0.14 | 0.19 | 0.31 |
| <i>Haemophilus influenzae</i>       | 1707 | 789 | 0.32 | 0.18 | 0.21 | 0.29 |
| <i>Helicobacter pylori</i>          | 1541 | 801 | 0.32 | 0.18 | 0.22 | 0.28 |
| <i>Klebsiella pneumoniae</i>        | 5169 | 843 | 0.21 | 0.28 | 0.30 | 0.20 |
| <i>Lactococcus lactis</i>           | 2264 | 756 | 0.34 | 0.16 | 0.20 | 0.30 |
| <i>Legionella pneumophila</i>       | 3164 | 861 | 0.32 | 0.18 | 0.21 | 0.29 |
| <i>Leuconostoc mesenteroides</i>    | 1998 | 804 | 0.32 | 0.17 | 0.21 | 0.29 |
| <i>Listeria monocytogenes</i>       | 2845 | 804 | 0.34 | 0.17 | 0.21 | 0.28 |
| <i>Lysinibacillus sphaericus</i>    | 4771 | 699 | 0.33 | 0.16 | 0.21 | 0.29 |
| <i>Mesoplasma florum</i>            | 683  | 891 | 0.41 | 0.11 | 0.16 | 0.32 |
| <i>Microcystis aeruginosa</i>       | 6308 | 555 | 0.29 | 0.20 | 0.22 | 0.28 |
| <i>Moorella thermoacetica</i>       | 2463 | 813 | 0.22 | 0.28 | 0.29 | 0.21 |
| <i>Mycobacterium tuberculosis</i>   | 4015 | 846 | 0.17 | 0.32 | 0.33 | 0.17 |
| <i>Mycoplasma pneumoniae</i>        | 688  | 857 | 0.32 | 0.19 | 0.20 | 0.28 |
| <i>Myxococcus xanthus</i>           | 7306 | 918 | 0.15 | 0.34 | 0.35 | 0.15 |
| <i>Neisseria meningitidis</i>       | 1906 | 762 | 0.25 | 0.27 | 0.26 | 0.21 |
| <i>Paracoccus denitrificans</i>     | 5077 | 837 | 0.16 | 0.33 | 0.34 | 0.16 |
| <i>Porphyromonas gingivalis</i>     | 1892 | 882 | 0.26 | 0.24 | 0.25 | 0.24 |
| <i>Prochlorococcus marinus</i>      | 1879 | 699 | 0.33 | 0.16 | 0.21 | 0.30 |
| <i>Propionibacterium acnes</i>      | 2297 | 873 | 0.19 | 0.30 | 0.30 | 0.21 |

|                                   |      |     |      |      |      |      |
|-----------------------------------|------|-----|------|------|------|------|
| <i>Pseudomonas aeruginosa</i>     | 5899 | 822 | 0.17 | 0.35 | 0.32 | 0.16 |
| <i>Rhizobium leguminosarum</i>    | 7131 | 855 | 0.19 | 0.31 | 0.30 | 0.19 |
| <i>Rhodobacter sphaeroides</i>    | 4277 | 822 | 0.15 | 0.34 | 0.34 | 0.16 |
| <i>Rhodospirillum rubrum</i>      | 3839 | 888 | 0.16 | 0.34 | 0.32 | 0.18 |
| <i>Salinibacter ruber</i>         | 2827 | 912 | 0.17 | 0.33 | 0.33 | 0.16 |
| <i>Salmonella enterica</i>        | 4542 | 816 | 0.24 | 0.25 | 0.28 | 0.23 |
| <i>Staphylococcus aureus</i>      | 2614 | 776 | 0.36 | 0.14 | 0.19 | 0.30 |
| <i>Streptococcus pneumoniae</i>   | 2085 | 723 | 0.30 | 0.18 | 0.22 | 0.29 |
| <i>Thermus thermophilus</i>       | 2230 | 777 | 0.15 | 0.35 | 0.35 | 0.15 |
| <i>Ureaplasma parvum</i>          | 611  | 864 | 0.40 | 0.12 | 0.14 | 0.34 |
| <i>Vibrio cholerae</i>            | 3771 | 780 | 0.26 | 0.23 | 0.25 | 0.26 |
| <i>Vibrio fischeri</i>            | 3799 | 855 | 0.31 | 0.18 | 0.21 | 0.30 |
| <i>Xanthomonas campestris</i>     | 4173 | 876 | 0.17 | 0.33 | 0.33 | 0.17 |
| <i>Yersinia pestis</i>            | 4188 | 789 | 0.26 | 0.23 | 0.26 | 0.26 |
| <i>Aeropyrum pernix</i>           | 1697 | 767 | 0.23 | 0.24 | 0.33 | 0.20 |
| <i>Candidatus korarchaeum</i>     | 1602 | 789 | 0.27 | 0.20 | 0.30 | 0.23 |
| <i>Haloarcula marismortui</i>     | 4225 | 728 | 0.21 | 0.31 | 0.31 | 0.17 |
| <i>Halobacterium salinarum</i>    | 2702 | 726 | 0.18 | 0.33 | 0.33 | 0.15 |
| <i>Haloferax volcanii</i>         | 4018 | 759 | 0.18 | 0.35 | 0.32 | 0.15 |
| <i>Methanobrevibacter smithii</i> | 1795 | 750 | 0.37 | 0.13 | 0.19 | 0.31 |
| <i>Methanococcus maripaludis</i>  | 1721 | 756 | 0.38 | 0.14 | 0.19 | 0.28 |
| <i>Nitrosopumilus maritimus</i>   | 1795 | 678 | 0.37 | 0.15 | 0.19 | 0.28 |

Table S1. List of the species analyzed, and some properties of their genes.
