# Supplementary material for: Nucleotide composition affects codon usage toward the 3'-end
Source: PubMed Central journal article supplement (PMC6892556; doi:10.1371/journal.pone.0225633), 2019-12-04
Supplement: pone.0225633.s016.pdf [file pone.0225633.s016.pdf]

| <b>Species</b>                  | <b>GC content - Efficiency</b> | <b>Efficiency - Fragility</b> | <b>Efficiency - Wobble position</b> |
|---------------------------------|--------------------------------|-------------------------------|-------------------------------------|
| <i>Anolis carolinensis</i>      | 0.93                           | 0.01                          | 0.62                                |
| <i>Bos taurus</i>               | 0.52                           | 0.03                          | 0.17                                |
| <i>Caenorhabditis elegans</i>   | 0.64                           | 0.27                          | 0.29                                |
| <i>Callithrix jacchus</i>       | 0.84                           | 0.02                          | 0.62                                |
| <i>Canis familiaris</i>         | 0.59                           | 0.07                          | 0.29                                |
| <i>Cavia porcellus</i>          | 0.47                           | 0.03                          | 0.04                                |
| <i>Danio rerio</i>              | 0.18                           | 0.36                          | 0.89                                |
| <i>Drosophila melanogaster</i>  | 0.89                           | 0.72                          | 0.14                                |
| <i>Equus caballus</i>           | 0.62                           | 0.01                          | 0.01                                |
| <i>Felis catus</i>              | 0.92                           | 0.03                          | 0.04                                |
| <i>Gallus gallus</i>            | 0.73                           | 0.39                          | 0.24                                |
| <i>Gasterosteus aculeatus</i>   | 0.77                           | 0.77                          | 0.82                                |
| <i>Gorilla gorilla</i>          | 0.97                           | 0.05                          | 0.79                                |
| <i>Homo sapiens</i>             | 0.52                           | 0.02                          | 0.26                                |
| <i>Loxodonta africana</i>       | 0.79                           | 0.88                          | 0.79                                |
| <i>Macaca mulatta</i>           | 0.78                           | 0.00                          | 0.10                                |
| <i>Meleagris gallopavo</i>      | 0.26                           | 0.33                          | 0.26                                |
| <i>Microcebus murinus</i>       | 0.24                           | 0.03                          | 0.52                                |
| <i>Monodelphis domestica</i>    | 0.50                           | 0.00                          | 0.25                                |
| <i>Mus musculus</i>             | 0.42                           | 0.02                          | 0.21                                |
| <i>Nomascus leucogenys</i>      | 0.52                           | 0.00                          | 0.22                                |
| <i>Ornithorhynchus anatinus</i> | 0.99                           | 0.02                          | 0.15                                |
| <i>Oryctolagus cuniculus</i>    | 0.39                           | 0.02                          | 0.52                                |
| <i>Oryzias latipes</i>          | 0.29                           | 0.22                          | 0.53                                |
| <i>Ovis aries</i>               | 0.99                           | 0.03                          | 0.99                                |

|                                        |      |      |      |
|----------------------------------------|------|------|------|
| <i>Pan troglodytes</i>                 | 0.98 | 0.02 | 0.04 |
| <i>Petromyzon marinus</i>              | 0.67 | 0.44 | 0.04 |
| <i>Rattus norvegicus</i>               | 0.46 | 0.11 | 0.12 |
| <i>Saccharomyces cerevisiae</i>        | 0.03 | 0.48 | 0.52 |
| <i>Sus scrofa</i>                      | 0.78 | 0.22 | 0.78 |
| <i>Taeniopygia guttata</i>             | 0.47 | 0.47 | 0.36 |
| <i>Takifugu rubripes</i>               | 0.55 | 0.55 | 0.21 |
| <i>Tetraodon nigroviridis</i>          | 0.36 | 0.33 | 0.46 |
| <i>Xenopus tropicalis</i>              | 1.00 | 0.23 | 1.00 |
| <i>Acinetobacter baumannii</i>         | 0.62 | 0.63 | 0.00 |
| <i>Actinobacillus pleuropneumoniae</i> | 0.13 | 0.83 | 0.00 |
| <i>Aeromonas hydrophila</i>            | 0.82 | 0.41 | 0.14 |
| <i>Anaplasma phagocytophilum</i>       | 0.08 | 0.81 | 0.00 |
| <i>Burkholderia pseudomallei</i>       | 0.19 | 0.77 | 0.05 |
| <i>Campylobacter jejuni</i>            | 0.12 | 0.90 | 0.01 |
| <i>Chlamydia trachomatis</i>           | 0.06 | 0.02 | 0.00 |
| <i>Chlorobium tepidum</i>              | 0.15 | 0.84 | 0.00 |
| <i>Clostridium botulinum</i>           | 0.08 | 0.08 | 0.06 |
| <i>Corynebacterium glutamicum</i>      | 0.68 | 0.93 | 0.02 |
| <i>Coxiella burnetii</i>               | 0.27 | 0.24 | 0.00 |
| <i>Desulfovibrio vulgaris</i>          | 0.24 | 0.30 | 0.03 |
| <i>Enterococcus faecalis</i>           | 0.38 | 0.52 | 0.00 |
| <i>Escherichia coli</i>                | 0.98 | 0.62 | 0.50 |
| <i>Flavobacterium psychrophilum</i>    | 0.35 | 0.56 | 0.04 |
| <i>Francisella tularensis</i>          | 0.17 | 0.79 | 0.03 |
| <i>Haemophilus influenzae</i>          | 0.59 | 0.73 | 0.00 |
| <i>Helicobacter pylori</i>             | 0.24 | 0.66 | 0.00 |
| <i>Klebsiella pneumoniae</i>           | 0.98 | 0.62 | 0.26 |

|                                   |      |      |      |
|-----------------------------------|------|------|------|
| <i>Lactococcus lactis</i>         | 0.52 | 0.37 | 0.08 |
| <i>Legionella pneumophila</i>     | 0.72 | 0.72 | 0.00 |
| <i>Leuconostoc mesenteroides</i>  | 0.62 | 0.62 | 0.64 |
| <i>Listeria monocytogenes</i>     | 0.78 | 0.79 | 0.01 |
| <i>Lysinibacillus sphaericus</i>  | 0.35 | 0.50 | 0.03 |
| <i>Mesoplasma florum</i>          | 0.30 | 0.16 | 0.27 |
| <i>Microcystis aeruginosa</i>     | 0.35 | 0.48 | 0.00 |
| <i>Moorella thermoacetica</i>     | 0.28 | 0.52 | 0.00 |
| <i>Mycobacterium tuberculosis</i> | 0.09 | 0.66 | 0.00 |
| <i>Mycoplasma pneumoniae</i>      | 0.02 | 0.05 | 0.00 |
| <i>Myxococcus xanthus</i>         | 0.05 | 0.27 | 0.00 |
| <i>Neisseria meningitidis</i>     | 0.84 | 0.62 | 0.00 |
| <i>Paracoccus denitrificans</i>   | 0.54 | 0.45 | 0.00 |
| <i>Porphyromonas gingivalis</i>   | 0.61 | 0.76 | 0.00 |
| <i>Prochlorococcus marinus</i>    | 0.68 | 0.32 | 0.00 |
| <i>Propionibacterium acnes</i>    | 0.09 | 0.66 | 0.00 |
| <i>Pseudomonas aeruginosa</i>     | 0.60 | 0.08 | 0.04 |
| <i>Rhizobium leguminosarum</i>    | 0.70 | 0.70 | 0.00 |
| <i>Rhodobacter sphaeroides</i>    | 0.46 | 0.28 | 0.00 |
| <i>Rhodospirillum rubrum</i>      | 0.24 | 0.85 | 0.00 |
| <i>Salinibacter ruber</i>         | 0.00 | 0.81 | 0.00 |
| <i>Salmonella enterica</i>        | 0.96 | 0.53 | 0.16 |
| <i>Staphylococcus aureus</i>      | 0.62 | 0.75 | 0.01 |
| <i>Streptococcus pneumoniae</i>   | 0.13 | 0.43 | 0.01 |
| <i>Thermus thermophilus</i>       | 0.03 | 0.81 | 0.00 |
| <i>Ureaplasma parvum</i>          | 0.90 | 0.14 | 0.10 |
| <i>Vibrio cholerae</i>            | 0.92 | 0.06 | 0.01 |
| <i>Vibrio fischeri</i>            | 0.08 | 0.11 | 0.05 |

|                                   |      |      |      |
|-----------------------------------|------|------|------|
| <i>Xanthomonas campestris</i>     | 0.02 | 0.94 | 0.00 |
| <i>Yersinia pestis</i>            | 0.51 | 0.63 | 0.10 |
| <i>Aeropyrum pernix</i>           | 0.04 | 0.43 | 0.00 |
| <i>Candidatus korarchaeum</i>     | 0.07 | 0.50 | 0.00 |
| <i>Haloarcula marismortui</i>     | 0.05 | 0.39 | 0.00 |
| <i>Halobacterium salinarum</i>    | 0.03 | 0.42 | 0.00 |
| <i>Haloferax volcanii</i>         | 0.10 | 0.42 | 0.00 |
| <i>Methanobrevibacter smithii</i> | 0.12 | 0.80 | 0.00 |
| <i>Methanococcus maripaludis</i>  | 0.25 | 0.47 | 0.00 |
| <i>Nitrosopumilus maritimus</i>   | 0.18 | 0.24 | 0.00 |

**Table S2.** For each species and for every pair of codon classification scheme where efficiency is part of, we computed the (FDR corrected) p-value of the  $\chi^2$  independence test.
