# Supplementary material for: Nucleotide composition affects codon usage toward the 3'-end
Source: PubMed Central journal article supplement (PMC6892556; doi:10.1371/journal.pone.0225633), 2019-12-04
Supplement: pone.0225633.s022.pdf [file pone.0225633.s022.pdf]

| position                        | 1    | 2    | 3    | 4    | 5    | 6    | 7    | 8    | 9    | 10   | 11   | 12   | 13   | 14   | 15   |
|---------------------------------|------|------|------|------|------|------|------|------|------|------|------|------|------|------|------|
| <i>Anolis carolinensis</i>      | 0.87 | 0.56 | 0.57 | 0.09 | 0.69 | 0.56 | 0.87 | 0.59 | 0.63 | 0.56 | 0.69 | 0.87 | 0.36 | 0.69 | 0.13 |
| <i>Bos taurus</i>               | 0.93 | 0.84 | 0.93 | 0.83 | 0.92 | 0.84 | 0.81 | 0.93 | 0.81 | 0.84 | 0.81 | 0.81 | 0.84 | 0.93 | 0.83 |
| <i>Caenorhabditis elegans</i>   | 0.97 | 0.97 | 0.97 | 0.97 | 0.97 | 0.97 | 0.97 | 0.97 | 0.97 | 0.97 | 0.97 | 0.97 | 0.97 | 0.97 | 0.97 |
| <i>Callithrix jacchus</i>       | 0.91 | 0.81 | 0.81 | 0.81 | 0.85 | 0.81 | 0.84 | 0.91 | 0.81 | 0.81 | 0.81 | 0.91 | 0.81 | 0.93 | 0.91 |
| <i>Canis familiaris</i>         | 0.74 | 0.62 | 0.62 | 0.62 | 0.63 | 0.62 | 0.62 | 0.88 | 0.62 | 0.62 | 0.94 | 0.36 | 0.74 | 0.83 | 0.62 |
| <i>Cavia porcellus</i>          | 0.82 | 0.82 | 0.89 | 0.82 | 0.82 | 0.89 | 0.82 | 0.88 | 0.83 | 0.82 | 0.83 | 0.82 | 0.82 | 0.85 | 0.82 |
| <i>Danio rerio</i>              | 0.46 | 0.19 | 0.56 | 0.54 | 0.15 | 0.15 | 0.12 | 0.41 | 0.15 | 0.15 | 0.15 | 0.22 | 0.54 | 0.46 | 0.15 |
| <i>Drosophila melanogaster</i>  | 0.88 | 0.97 | 0.40 | 0.85 | 0.73 | 0.40 | 0.40 | 0.40 | 0.40 | 0.73 | 0.86 | 0.40 | 0.99 | 0.40 | 0.86 |
| <i>Equus caballus</i>           | 0.97 | 0.87 | 0.87 | 0.79 | 0.79 | 0.87 | 0.79 | 0.91 | 0.38 | 0.99 | 0.87 | 0.79 | 0.97 | 0.79 | 0.79 |
| <i>Felis catus</i>              | 0.97 | 0.87 | 0.87 | 0.79 | 0.79 | 0.87 | 0.79 | 0.91 | 0.38 | 0.99 | 0.87 | 0.79 | 0.97 | 0.79 | 0.79 |
| <i>Gallus gallus</i>            | 0.97 | 0.87 | 0.87 | 0.79 | 0.79 | 0.87 | 0.79 | 0.91 | 0.38 | 0.99 | 0.87 | 0.79 | 0.97 | 0.79 | 0.79 |
| <i>Gasterosteus aculeatus</i>   | 0.60 | 0.60 | 0.44 | 0.60 | 0.65 | 0.13 | 0.44 | 0.68 | 0.25 | 0.60 | 0.44 | 0.60 | 0.58 | 0.66 | 0.71 |
| <i>Gorilla gorilla</i>          | 0.77 | 0.94 | 0.64 | 0.74 | 0.60 | 0.60 | 0.64 | 0.94 | 0.17 | 0.94 | 0.94 | 0.94 | 0.94 | 0.94 | 0.94 |
| <i>Homo sapiens</i>             | 0.86 | 0.86 | 0.86 | 0.86 | 0.86 | 0.87 | 0.86 | 0.87 | 0.86 | 0.86 | 0.86 | 0.86 | 0.94 | 0.86 | 0.86 |
| <i>Loxodonta africana</i>       | 0.93 | 0.93 | 0.93 | 0.93 | 0.93 | 0.93 | 0.93 | 0.93 | 0.93 | 0.93 | 0.93 | 0.93 | 0.93 | 0.93 | 1.00 |
| <i>Macaca mulatta</i>           | 0.92 | 0.85 | 0.89 | 0.89 | 0.76 | 0.76 | 0.76 | 0.76 | 0.76 | 0.92 | 0.92 | 0.92 | 0.92 | 0.92 | 0.92 |
| <i>Meleagris gallopavo</i>      | 0.93 | 0.95 | 0.95 | 0.95 | 0.95 | 0.93 | 0.95 | 0.95 | 0.95 | 0.93 | 0.93 | 0.93 | 0.95 | 0.95 | 0.95 |
| <i>Microcebus murinus</i>       | 0.95 | 0.95 | 0.95 | 0.95 | 0.95 | 0.95 | 0.95 | 0.95 | 0.95 | 0.95 | 0.95 | 0.95 | 0.95 | 0.95 | 0.95 |
| <i>Monodelphis domestica</i>    | 0.81 | 0.81 | 0.81 | 0.81 | 0.81 | 0.81 | 0.81 | 0.89 | 0.94 | 0.94 | 0.98 | 0.81 | 0.81 | 0.81 | 0.81 |
| <i>Mus musculus</i>             | 0.96 | 0.96 | 0.99 | 0.96 | 0.96 | 0.99 | 0.99 | 0.96 | 0.96 | 0.96 | 0.99 | 0.96 | 0.96 | 0.96 | 0.99 |
| <i>Nomascus leucogenys</i>      | 0.90 | 0.76 | 0.76 | 0.90 | 0.76 | 0.76 | 0.76 | 0.93 | 0.76 | 0.93 | 0.93 | 0.93 | 0.93 | 0.93 | 0.76 |
| <i>Ornithorhynchus anatinus</i> | 0.78 | 0.90 | 0.78 | 0.78 | 0.78 | 0.78 | 0.78 | 0.96 | 0.97 | 0.78 | 0.78 | 0.97 | 0.97 | 0.78 | 0.96 |
| <i>Oryctolagus cuniculus</i>    | 0.89 | 0.95 | 0.89 | 0.89 | 0.89 | 0.89 | 0.89 | 0.89 | 0.89 | 0.89 | 0.89 | 0.88 | 0.89 | 0.89 | 0.89 |
| <i>Oryzias latipes</i>          | 0.87 | 0.47 | 0.71 | 0.66 | 0.66 | 0.66 | 0.47 | 0.66 | 0.83 | 0.75 | 0.66 | 0.66 | 0.97 | 0.71 | 0.75 |
| <i>Ovis aries</i>               | 0.94 | 0.90 | 1.00 | 0.90 | 0.90 | 0.94 | 0.90 | 0.94 | 0.90 | 0.90 | 0.90 | 0.90 | 0.90 | 0.90 | 0.90 |
| <i>Pan troglodytes</i>          | 0.74 | 0.74 | 0.74 | 0.74 | 0.74 | 0.74 | 0.74 | 0.74 | 0.74 | 0.74 | 0.90 | 0.74 | 0.74 | 0.77 | 0.74 |
| <i>Petromyzon marinus</i>       | 0.95 | 0.95 | 0.95 | 0.95 | 0.95 | 0.97 | 0.95 | 0.95 | 0.95 | 0.95 | 0.95 | 0.95 | 0.95 | 0.95 | 0.95 |
| <i>Rattus norvegicus</i>        | 0.91 | 0.91 | 0.91 | 0.91 | 0.91 | 0.91 | 0.91 | 0.91 | 0.91 | 0.91 | 0.91 | 0.91 | 0.91 | 0.91 | 0.91 |
| <i>Saccharomyces cerevisiae</i> | 0.98 | 0.98 | 0.98 | 0.98 | 0.98 | 0.98 | 0.98 | 0.98 | 0.98 | 0.98 | 0.98 | 0.98 | 0.98 | 0.98 | 0.98 |
| <i>Sus scrofa</i>               | 0.99 | 0.90 | 0.90 | 0.90 | 0.90 | 0.99 | 0.90 | 0.90 | 0.90 | 0.99 | 0.71 | 0.90 | 0.90 | 0.97 | 0.90 |
| <i>Taeniopygia guttata</i>      | 0.88 | 0.59 | 0.88 | 0.59 | 0.78 | 0.81 | 0.59 | 0.78 | 0.63 | 0.70 | 0.81 | 0.55 | 0.78 | 0.78 | 0.78 |
| <i>Takifugu rubripes</i>        | 0.85 | 0.85 | 0.95 | 0.85 | 0.85 | 0.95 | 0.07 | 0.64 | 0.76 | 0.85 | 0.85 | 0.76 | 0.85 | 0.95 | 0.64 |
| <i>Tetraodon nigroviridis</i>   | 0.91 | 0.91 | 0.91 | 0.91 | 0.81 | 0.91 | 0.82 | 0.60 | 0.52 | 0.91 | 0.91 | 0.91 | 0.60 | 0.91 | 0.81 |

|                                        |      |      |      |      |      |      |      |      |      |      |      |      |      |      |      |
|----------------------------------------|------|------|------|------|------|------|------|------|------|------|------|------|------|------|------|
| <i>Xenopus tropicalis</i>              | 0.42 | 0.42 | 0.29 | 0.33 | 0.26 | 0.42 | 0.43 | 0.29 | 0.48 | 0.30 | 0.30 | 0.39 | 0.53 | 0.52 | 0.20 |
| <i>Acinetobacter baumannii</i>         | 0.77 | 0.64 | 0.48 | 0.39 | 0.35 | 0.20 | 0.64 | 0.60 | 0.64 | 0.64 | 0.86 | 0.61 | 0.84 | 0.77 | 0.39 |
| <i>Actinobacillus pleuropneumoniae</i> | 0.77 | 0.66 | 0.66 | 0.77 | 0.53 | 0.76 | 0.41 | 0.74 | 0.74 | 0.79 | 0.95 | 0.95 | 0.94 | 0.66 | 0.94 |
| <i>Aeromonas hydrophila</i>            | 0.60 | 0.60 | 0.20 | 0.96 | 0.60 | 0.20 | 0.92 | 0.93 | 0.92 | 0.96 | 0.96 | 0.81 | 0.96 | 0.96 | 0.60 |
| <i>Anaplasma phagocytophilum</i>       | 0.54 | 0.76 | 0.76 | 0.76 | 0.76 | 0.76 | 0.83 | 0.76 | 0.76 | 0.64 | 0.82 | 0.76 | 0.88 | 0.51 | 1.00 |
| <i>Burkholderia pseudomallei</i>       | 0.24 | 0.24 | 0.24 | 0.24 | 0.24 | 0.24 | 0.24 | 0.26 | 0.84 | 0.47 | 0.45 | 0.38 | 0.26 | 0.28 | 0.75 |
| <i>Campylobacter jejuni</i>            | 1.00 | 0.83 | 0.96 | 1.00 | 0.96 | 0.96 | 1.00 | 0.32 | 1.00 | 1.00 | 1.00 | 1.00 | 0.08 | 1.00 | 1.00 |
| <i>Chlamydia trachomatis</i>           | 0.98 | 0.98 | 0.71 | 0.96 | 0.92 | 1.00 | 0.98 | 0.71 | 0.98 | 0.96 | 0.87 | 0.96 | 0.98 | 1.00 | 0.71 |
| <i>Chlorobium tepidum</i>              | 0.31 | 0.29 | 0.31 | 0.39 | 0.31 | 0.38 | 0.31 | 0.36 | 0.31 | 0.30 | 0.29 | 0.88 | 0.38 | 0.29 | 0.29 |
| <i>Clostridium botulinum</i>           | 0.94 | 0.94 | 0.94 | 0.94 | 0.94 | 0.94 | 0.94 | 0.06 | 0.94 | 0.94 | 0.94 | 0.94 | 0.94 | 0.58 | 0.94 |
| <i>Corynebacterium glutamicum</i>      | 0.36 | 0.37 | 0.29 | 0.31 | 0.15 | 0.32 | 0.31 | 0.32 | 0.79 | 0.15 | 0.15 | 0.29 | 0.97 | 0.60 | 0.54 |
| <i>Coxiella burnetii</i>               | 0.62 | 0.62 | 0.68 | 0.56 | 0.68 | 0.68 | 0.68 | 0.68 | 0.62 | 0.62 | 0.25 | 1.00 | 0.99 | 0.81 | 0.68 |
| <i>Desulfovibrio vulgaris</i>          | 0.33 | 0.33 | 0.33 | 0.34 | 0.34 | 0.86 | 0.89 | 0.79 | 0.74 | 0.34 | 0.79 | 0.92 | 0.51 | 0.34 | 0.51 |
| <i>Enterococcus faecalis</i>           | 0.89 | 0.89 | 0.89 | 0.89 | 0.89 | 0.89 | 0.89 | 0.89 | 0.89 | 0.89 | 0.94 | 0.89 | 0.89 | 0.89 | 0.94 |
| <i>Escherichia coli</i>                | 0.13 | 0.13 | 0.04 | 0.04 | 0.04 | 0.04 | 0.04 | 0.08 | 0.40 | 0.67 | 0.09 | 0.85 | 0.52 | 0.08 | 0.09 |
| <i>Flavobacterium psychrophilum</i>    | 0.85 | 0.85 | 0.85 | 0.91 | 1.00 | 1.00 | 1.00 | 0.85 | 1.00 | 0.98 | 0.85 | 0.85 | 1.00 | 1.00 | 0.85 |
| <i>Francisella tularensis</i>          | 0.69 | 1.00 | 1.00 | 0.84 | 0.54 | 0.84 | 1.00 | 0.84 | 1.00 | 0.95 | 0.84 | 0.94 | 1.00 | 0.54 | 0.84 |
| <i>Haemophilus influenzae</i>          | 0.76 | 0.73 | 0.73 | 0.36 | 0.73 | 0.73 | 0.76 | 0.73 | 0.76 | 0.76 | 0.76 | 0.73 | 0.73 | 0.90 | 0.90 |
| <i>Helicobacter pylori</i>             | 0.78 | 0.79 | 0.78 | 0.79 | 0.78 | 0.79 | 0.78 | 0.95 | 0.90 | 0.90 | 0.78 | 0.95 | 0.79 | 0.80 | 0.95 |
| <i>Klebsiella pneumoniae</i>           | 0.39 | 0.17 | 0.27 | 0.11 | 0.11 | 0.27 | 0.27 | 0.28 | 0.35 | 0.35 | 0.37 | 0.27 | 0.53 | 0.87 | 0.13 |
| <i>Lactococcus lactis</i>              | 0.98 | 0.99 | 0.97 | 0.92 | 0.97 | 0.98 | 0.62 | 0.98 | 0.99 | 0.97 | 0.98 | 0.98 | 0.99 | 0.98 | 0.99 |
| <i>Legionella pneumophila</i>          | 0.79 | 0.99 | 0.86 | 0.79 | 0.79 | 0.86 | 0.86 | 0.99 | 0.79 | 0.86 | 0.86 | 0.79 | 0.79 | 0.86 | 0.86 |
| <i>Leuconostoc mesenteroides</i>       | 0.72 | 0.84 | 0.84 | 0.72 | 0.72 | 0.72 | 0.87 | 0.84 | 0.22 | 0.91 | 0.72 | 0.84 | 0.93 | 0.95 | 0.72 |
| <i>Listeria monocytogenes</i>          | 0.66 | 0.70 | 0.41 | 0.70 | 0.49 | 0.52 | 0.35 | 0.80 | 0.92 | 0.92 | 0.72 | 0.70 | 0.54 | 0.92 | 0.80 |
| <i>Lysinibacillus sphaericus</i>       | 0.72 | 0.85 | 0.85 | 0.72 | 0.41 | 0.85 | 0.85 | 0.87 | 0.91 | 0.93 | 0.93 | 0.85 | 0.72 | 0.93 | 0.89 |
| <i>Mesoplasma florum</i>               | 0.93 | 0.93 | 0.93 | 0.93 | 0.93 | 0.93 | 0.93 | 0.93 | 0.93 | 0.94 | 0.93 | 0.93 | 0.93 | 0.47 | 0.93 |
| <i>Microcystis aeruginosa</i>          | 0.55 | 0.56 | 0.72 | 0.65 | 0.65 | 0.65 | 0.22 | 0.66 | 0.65 | 0.22 | 0.72 | 0.66 | 0.80 | 0.56 | 0.72 |
| <i>Moorella thermoacetica</i>          | 0.61 | 0.27 | 0.27 | 0.63 | 0.27 | 0.62 | 0.27 | 0.82 | 0.63 | 0.63 | 0.27 | 0.76 | 0.75 | 0.27 | 0.63 |
| <i>Mycobacterium tuberculosis</i>      | 0.52 | 0.52 | 0.46 | 0.46 | 0.42 | 0.45 | 0.80 | 0.92 | 0.52 | 0.45 | 0.52 | 0.75 | 0.57 | 0.52 | 0.52 |
| <i>Mycoplasma pneumoniae</i>           | 0.95 | 0.82 | 0.40 | 0.93 | 0.92 | 0.61 | 0.99 | 0.85 | 0.92 | 0.71 | 0.99 | 0.99 | 0.40 | 0.95 | 0.40 |
| <i>Myxococcus xanthus</i>              | 0.73 | 0.73 | 0.73 | 0.73 | 0.93 | 0.95 | 0.73 | 0.73 | 0.73 | 0.91 | 0.73 | 0.86 | 0.73 | 0.93 | 0.73 |

|                                   |      |      |      |      |      |      |      |      |      |      |      |      |      |      |      |
|-----------------------------------|------|------|------|------|------|------|------|------|------|------|------|------|------|------|------|
| <i>Neisseria meningitidis</i>     | 0.16 | 0.16 | 0.34 | 0.16 | 0.37 | 0.20 | 0.18 | 0.25 | 0.18 | 0.19 | 0.34 | 0.25 | 0.90 | 0.83 | 0.37 |
| <i>Paracoccus denitrificans</i>   | 0.35 | 0.14 | 0.27 | 0.23 | 0.53 | 0.27 | 0.73 | 0.69 | 0.36 | 0.78 | 0.35 | 0.69 | 0.79 | 0.58 | 0.27 |
| <i>Porphyromonas gingivalis</i>   | 0.30 | 0.30 | 0.58 | 0.30 | 0.43 | 0.43 | 0.43 | 0.71 | 0.97 | 0.68 | 0.97 | 0.64 | 0.55 | 0.43 | 0.64 |
| <i>Prochlorococcus marinus</i>    | 0.66 | 0.62 | 0.62 | 0.97 | 0.97 | 0.84 | 0.62 | 0.66 | 0.35 | 0.62 | 0.97 | 0.62 | 0.84 | 0.62 | 0.62 |
| <i>Propionibacterium acnes</i>    | 0.36 | 0.52 | 0.65 | 0.49 | 0.10 | 0.61 | 0.61 | 0.49 | 0.36 | 0.60 | 0.61 | 0.96 | 0.60 | 0.71 | 0.96 |
| <i>Pseudomonas aeruginosa</i>     | 0.47 | 0.47 | 0.25 | 0.47 | 0.25 | 0.34 | 0.53 | 0.79 | 0.47 | 0.79 | 0.94 | 0.61 | 0.99 | 0.34 | 0.38 |
| <i>Rhizobium leguminosarum</i>    | 0.57 | 0.20 | 0.11 | 0.48 | 0.57 | 0.33 | 0.57 | 0.49 | 0.77 | 0.69 | 0.98 | 0.98 | 0.80 | 0.98 | 0.57 |
| <i>Rhodobacter sphaeroides</i>    | 0.54 | 0.29 | 0.34 | 0.29 | 0.92 | 0.64 | 0.64 | 0.67 | 0.64 | 0.90 | 0.97 | 0.64 | 0.42 | 0.90 | 0.29 |
| <i>Rhodospirillum rubrum</i>      | 0.56 | 0.56 | 0.56 | 0.79 | 0.40 | 0.56 | 0.84 | 0.56 | 0.56 | 0.84 | 0.56 | 0.98 | 0.98 | 0.84 | 0.97 |
| <i>Salinibacter ruber</i>         | 0.37 | 0.95 | 0.84 | 0.79 | 0.74 | 0.84 | 0.84 | 0.84 | 0.84 | 0.97 | 0.74 | 0.92 | 0.74 | 0.79 | 0.84 |
| <i>Salmonella enterica</i>        | 0.18 | 0.13 | 0.14 | 0.10 | 0.10 | 0.10 | 0.13 | 0.53 | 0.13 | 0.60 | 0.91 | 0.37 | 0.91 | 0.10 | 0.30 |
| <i>Staphylococcus aureus</i>      | 0.42 | 0.93 | 0.89 | 0.65 | 0.78 | 0.65 | 0.42 | 0.78 | 0.98 | 0.62 | 0.78 | 0.42 | 0.65 | 0.98 | 0.65 |
| <i>Streptococcus pneumoniae</i>   | 0.91 | 0.91 | 0.91 | 0.91 | 0.91 | 0.91 | 0.91 | 0.91 | 0.91 | 0.91 | 0.91 | 0.91 | 0.91 | 0.91 | 0.91 |
| <i>Thermus thermophilus</i>       | 0.60 | 0.88 | 0.56 | 0.46 | 0.56 | 0.80 | 0.89 | 0.46 | 0.76 | 0.85 | 0.46 | 0.95 | 0.46 | 0.90 | 0.80 |
| <i>Ureaplasma parvum</i>          | 0.68 | 0.99 | 0.68 | 0.68 | 0.66 | 0.68 | 0.78 | 0.87 | 0.68 | 0.68 | 0.88 | 0.88 | 0.68 | 0.68 | 0.78 |
| <i>Vibrio cholerae</i>            | 0.36 | 0.19 | 0.60 | 0.14 | 0.14 | 0.14 | 0.60 | 0.36 | 0.60 | 0.75 | 0.38 | 0.60 | 0.44 | 0.82 | 0.74 |
| <i>Vibrio fischeri</i>            | 0.70 | 0.73 | 0.44 | 0.73 | 0.36 | 0.44 | 0.23 | 0.99 | 0.96 | 0.70 | 0.77 | 0.44 | 0.77 | 0.44 | 0.52 |
| <i>Xanthomonas campestris</i>     | 0.40 | 0.89 | 0.32 | 0.25 | 0.40 | 0.69 | 0.89 | 0.78 | 0.93 | 0.78 | 0.69 | 0.69 | 0.69 | 0.72 | 0.69 |
| <i>Yersinia pestis</i>            | 0.40 | 0.89 | 0.32 | 0.25 | 0.40 | 0.69 | 0.89 | 0.78 | 0.93 | 0.78 | 0.69 | 0.69 | 0.69 | 0.72 | 0.69 |
| <i>Aeropyrum pernix</i>           | 0.30 | 0.30 | 0.91 | 0.36 | 0.91 | 0.30 | 0.36 | 0.97 | 0.91 | 0.84 | 0.91 | 0.73 | 0.91 | 0.91 | 0.70 |
| <i>Candidatus korarchaeum</i>     | 0.53 | 0.52 | 0.87 | 0.87 | 0.87 | 0.87 | 0.87 | 0.81 | 0.94 | 0.87 | 0.87 | 0.87 | 0.52 | 0.69 | 0.52 |
| <i>Haloarcula marismortui</i>     | 0.40 | 0.64 | 0.64 | 0.57 | 0.21 | 0.57 | 0.64 | 0.79 | 0.94 | 0.64 | 0.64 | 0.21 | 0.81 | 0.93 | 0.95 |
| <i>Halobacterium salinarum</i>    | 0.57 | 0.89 | 0.93 | 0.90 | 0.95 | 0.89 | 1.00 | 0.93 | 0.99 | 1.00 | 0.51 | 0.93 | 1.00 | 0.93 | 1.00 |
| <i>Haloferax volcanii</i>         | 0.64 | 0.69 | 0.93 | 0.93 | 0.69 | 0.69 | 0.93 | 0.93 | 0.98 | 0.93 | 0.69 | 0.69 | 0.93 | 0.94 | 0.94 |
| <i>Methanobrevibacter smithii</i> | 0.99 | 0.99 | 0.99 | 0.81 | 0.99 | 0.99 | 0.99 | 0.99 | 0.99 | 0.99 | 0.99 | 0.99 | 0.99 | 0.70 | 0.99 |
| <i>Methanococcus maripaludis</i>  | 0.99 | 0.99 | 0.99 | 0.99 | 0.91 | 0.99 | 0.99 | 0.99 | 0.99 | 0.91 | 0.99 | 0.91 | 0.99 | 0.91 | 0.99 |
| <i>Nitrosopumilus maritimus</i>   | 1.00 | 0.95 | 1.00 | 0.95 | 0.95 | 1.00 | 0.95 | 0.95 | 1.00 | 1.00 | 0.95 | 0.95 | 0.95 | 0.96 | 1.00 |

**Table S8.** For each position (distance from the stop codon, columns) and for every species, we computed the Kruskal-Wallis (FDR corrected) p-value, measuring the difference in the distribution of RSCA values between replaceable, non-replaceable, and non-fragile that end by A/T.
