# Supplementary material for: Nucleotide composition affects codon usage toward the 3'-end
Source: PubMed Central journal article supplement (PMC6892556; doi:10.1371/journal.pone.0225633), 2019-12-04
Supplement: pone.0225633.s024.pdf [file pone.0225633.s024.pdf]

| <b>Species</b>                     | <b>Median<br/>expected MFE</b> | <b>Median<br/>observed MFE</b> | <b>p-value</b> |
|------------------------------------|--------------------------------|--------------------------------|----------------|
| <i>Anolis carolinensis</i>         | -9.8                           | -7.6                           | 2.150e-38      |
| <i>Bos taurus</i>                  | -9.4                           | -7.3                           | 2.755e-48      |
| <i>Caenorhabditis<br/>elegans</i>  | -8.4                           | -6.1                           | 1.622e-72      |
| <i>Callithrix jacchus</i>          | -9.4                           | -7.4                           | 6.827e-40      |
| <i>Canis familiaris</i>            | -10.5                          | -8.2                           | 7.198e-41      |
| <i>Cavia porcellus</i>             | -9.7                           | -7.7                           | 5.008e-32      |
| <i>Danio rerio</i>                 | -9.1                           | -6.9                           | 1.324e-42      |
| <i>Drosophila<br/>melanogaster</i> | -8.8                           | -7.3                           | 2.928e-45      |
| <i>Equus caballus</i>              | -9.6                           | -7.7                           | 7.464e-37      |
| <i>Felis catus</i>                 | -9.9                           | -8.0                           | 2.241e-38      |
| <i>Gallus gallus</i>               | -9.7                           | -7.7                           | 5.803e-44      |
| <i>Gasterosteus<br/>aculeatus</i>  | -10.2                          | -8.8                           | 4.017e-11      |
| <i>Gorilla gorilla</i>             | -10.1                          | -7.7                           | 3.359e-48      |
| <i>Homo sapiens</i>                | -9.8                           | -8.4                           | 1.500e-18      |
| <i>Loxodonta africana</i>          | -9.4                           | -7.8                           | 1.895e-24      |
| <i>Macaca mulatta</i>              | -9.5                           | -7.6                           | 3.644e-41      |
| <i>Meleagris gallopavo</i>         | -10.0                          | -8.8                           | 2.748e-12      |
| <i>Microcebus murinus</i>          | -9.6                           | -7.7                           | 4.077e-43      |

|                                        |       |      |           |
|----------------------------------------|-------|------|-----------|
| <b><i>Monodelphis domestica</i></b>    | -9.4  | -7.1 | 3.484e-46 |
| <b><i>Mus musculus</i></b>             | -9.8  | -8.0 | 1.783e-21 |
| <b><i>Nomascus leucogenys</i></b>      | -9.9  | -7.7 | 3.664e-39 |
| <b><i>Ornithorhynchus anatinus</i></b> | -9.3  | -7.5 | 3.728e-24 |
| <b><i>Oryctolagus cuniculus</i></b>    | -11.0 | -9.5 | 5.332e-21 |
| <b><i>Oryzias latipes</i></b>          | -9.8  | -8.6 | 1.177e-24 |
| <b><i>Ovis aries</i></b>               | -9.9  | -7.6 | 2.909e-47 |
| <b><i>Pan troglodytes</i></b>          | -10.0 | -8.0 | 1.045e-32 |
| <b><i>Petromyzon marinus</i></b>       | -10.1 | -8.9 | 3.406e-13 |
| <b><i>Rattus norvegicus</i></b>        | -9.7  | -7.6 | 8.945e-52 |
| <b><i>Saccharomyces cerevisiae</i></b> | -7.9  | -5.3 | 1.212e-83 |
| <b><i>Sus scrofa</i></b>               | -9.4  | -7.3 | 1.952e-33 |
| <b><i>Taeniopygia guttata</i></b>      | -9.9  | -8.2 | 2.798e-19 |
| <b><i>Takifugu rubripes</i></b>        | -10.1 | -8.5 | 2.567e-22 |
| <b><i>Tetraodon nigroviridis</i></b>   | -10.1 | -8.3 | 6.676e-44 |
| <b><i>Xenopus tropicalis</i></b>       | -8.9  | -6.5 | 1.533e-56 |
| <b><i>Acinetobacter baumannii</i></b>  | -8.5  | -5.9 | 2.989e-81 |
| <b><i>Actinobacillus</i></b>           | -8.8  | -6.1 | 2.674e-94 |

|                                     |       |       |            |
|-------------------------------------|-------|-------|------------|
| <i>pleuropneumoniae</i>             |       |       |            |
| <i>Aeromonas hydrophila</i>         | -12.2 | -11.3 | 3.487e-21  |
| <i>Aeropyrum pernix</i>             | -11.6 | -9.6  | 4.811e-66  |
| <i>Anaplasma phagocytophilum</i>    | -8.6  | -6.6  | 6.184e-64  |
| <i>Burkholderia pseudomallei</i>    | -14.8 | -14.0 | 4.810e-10  |
| <i>Campylobacter jejuni</i>         | -7.2  | -4.1  | 2.281e-106 |
| <i>Candidatus korarchaeum</i>       | -10.7 | -8.3  | 1.040e-81  |
| <i>Chlamydia trachomatis</i>        | -8.8  | -6.1  | 1.640e-68  |
| <i>Chlorobium tepidum</i>           | -10.4 | -8.8  | 1.211e-54  |
| <i>Clostridium botulinum</i>        | -6.9  | -3.6  | 2.173e-103 |
| <i>Corynebacterium glutamicum</i>   | -10.4 | -8.8  | 1.449e-50  |
| <i>Coxiella burnetii</i>            | -8.7  | -6.1  | 1.676e-81  |
| <i>Desulfovibrio vulgaris</i>       | -12.8 | -11.2 | 1.465e-37  |
| <i>Enterococcus faecalis</i>        | -8.2  | -4.9  | 1.545e-108 |
| <i>Escherichia coli</i>             | -10.3 | -8.4  | 6.433e-69  |
| <i>Flavobacterium psychrophilum</i> | -6.7  | -3.5  | 8.408e-111 |

|                                   |       |       |            |
|-----------------------------------|-------|-------|------------|
| <i>Francisella tularensis</i>     | -7.2  | -4.5  | 1.006e-99  |
| <i>Haemophilus influenzae</i>     | -8.6  | -5.7  | 1.258e-91  |
| <i>Haloarcula marismortui</i>     | -11.6 | -9.8  | 1.051e-48  |
| <i>Halobacterium salinarum</i>    | -12.1 | -10.6 | 7.539e-31  |
| <i>Haloferax volcanii</i>         | -12.9 | -11.8 | 1.195e-19  |
| <i>Helicobacter pylori</i>        | -7.9  | -5.1  | 2.902e-91  |
| <i>Klebsiella pneumoniae</i>      | -11.1 | -9.1  | 2.711e-67  |
| <i>Lactococcus lactis</i>         | -7.8  | -4.8  | 1.545e-108 |
| <i>Legionella pneumophila</i>     | -8.2  | -5.4  | 4.305e-101 |
| <i>Leuconostoc mesenteroides</i>  | -7.7  | -5.1  | 1.044e-81  |
| <i>Listeria monocytogenes</i>     | -7.8  | -4.6  | 9.034e-106 |
| <i>Lysinibacillus sphaericus</i>  | -8.1  | -5.0  | 1.117e-111 |
| <i>Mesoplasma florum</i>          | -6.9  | -3.5  | 4.396e-80  |
| <i>Methanobrevibacter smithii</i> | -7.4  | -4.3  | 1.888e-106 |
| <i>Methanococcus maripaludis</i>  | -7.4  | -4.0  | 4.694e-115 |

|                                          |       |       |            |
|------------------------------------------|-------|-------|------------|
| <b><i>Microcystis aeruginosa</i></b>     | -8.6  | -5.9  | 1.444e-84  |
| <b><i>Moorella thermoacetica</i></b>     | -11.1 | -9.2  | 5.245e-78  |
| <b><i>Mycobacterium tuberculosis</i></b> | -13.5 | -12.5 | 8.686e-31  |
| <b><i>Mycoplasma pneumoniae</i></b>      | -7.8  | -5.2  | 8.711e-67  |
| <b><i>Myxococcus xanthus</i></b>         | -14.5 | -13.9 | 6.959e-05  |
| <b><i>Neisseria meningitidis</i></b>     | -10.3 | -8.0  | 4.961e-77  |
| <b><i>Nitrosopumilus maritimus</i></b>   | -7.7  | -4.5  | 8.049e-107 |
| <b><i>Paracoccus denitrificans</i></b>   | -14.0 | -12.9 | 3.271e-31  |
| <b><i>Porphyromonas gingivalis</i></b>   | -9.2  | -6.9  | 7.527e-87  |
| <b><i>Prochlorococcus marinus</i></b>    | -8.2  | -5.2  | 1.847e-101 |
| <b><i>Propionibacterium acnes</i></b>    | -11.9 | -10.6 | 1.852e-25  |
| <b><i>Pseudomonas aeruginosa</i></b>     | -13.9 | -12.9 | 2.532e-20  |
| <b><i>Rhizobium leguminosarum</i></b>    | -12.5 | -10.9 | 1.791e-40  |
| <b><i>Rhodobacter</i></b>                | -14.4 | -13.6 | 4.976e-14  |

|                                 |       |       |            |
|---------------------------------|-------|-------|------------|
| <i>sphaeroides</i>              |       |       |            |
| <i>Rhodospirillum rubrum</i>    | -13.5 | -12.6 | 3.375e-25  |
| <i>Salinibacter ruber</i>       | -13.1 | -12.4 | 2.054e-22  |
| <i>Salmonella enterica</i>      | -10.4 | -8.6  | 2.345e-60  |
| <i>Staphylococcus aureus</i>    | -7.3  | -4.1  | 1.450e-107 |
| <i>Streptococcus pneumoniae</i> | -8.4  | -5.5  | 8.344e-86  |
| <i>Thermus thermophilus</i>     | -15.0 | -14.3 | 4.446e-29  |
| <i>Ureaplasma parvum</i>        | -6.4  | -3.3  | 1.415e-65  |
| <i>Vibrio cholerae</i>          | -9.5  | -7.4  | 1.062e-62  |
| <i>Vibrio fischeri</i>          | -8.4  | -5.8  | 7.876e-85  |
| <i>Xanthomonas campestris</i>   | -13.7 | -13.0 | 2.095e-18  |
| <i>Yersinia pestis</i>          | -9.9  | -7.7  | 3.353e-62  |

**Table S10.** Median minimum free energy (MFE) at the 3'-end (observed MFE), median MFE expected by the global (not spatial) codon bias (expected MFE), and p-value for testing whether the median difference between pairs of expected and observed values equals zero (FDR-corrected two-sided sign test).
